# Supplementary material
Source: PubMed Central journal article supplement (PMC6583021)
Supplement: jamapediatr-172-e183310-s001.pdf [file jamapediatr-172-e183310-s001.pdf]

## Supplementary Online Content

de Ferranti SD, Gauvreau K, Friedman KG, et al. Association of initially normal coronary arteries with normal findings on follow-up echocardiography in patients with Kawasaki disease. *JAMA Cardiol*. Published online October 1, 2018.  
doi:10.1001/jamapediatrics.2018.3310

**eTable 1.** Patients excluded for incomplete echo data. Any given patient may have incomplete data at multiple time points therefore the categories are not exclusive.

**eTable 2.** Comparison of patients meeting study criteria entry versus those meeting criteria but without complete echo data. Values shown are number (percent) or median [25<sup>th</sup>, 75<sup>th</sup> percentile].

This supplementary material has been provided by the authors to give readers additional information about their work.

**eTable 1.** Patients excluded for incomplete echo data. Any given patient may have incomplete data at multiple time points therefore the categories are not exclusive.

|                                               | <b>Number of patients excluded</b> |
|-----------------------------------------------|------------------------------------|
| No qualifying baseline echo ( $\leq 10$ days) | 294                                |
| Baseline RCA or LAD Z score not available     | 69                                 |
| No qualifying 2 week echo (7-21 days)         | 266                                |
| 2 week RCA or LAD z score not available       | 36                                 |
| No qualifying 6 week echo (22 to 63 days)     | 369                                |
| 6 week RCA or LAD z score not available       | 27                                 |

**eTable 2.** Comparison of patients meeting study criteria entry versus those meeting criteria but without complete echo data. Values shown are number (percent) or median [25<sup>th</sup>, 75<sup>th</sup> percentile].

|                                      | <b>In Study<br/>(n=464)</b> | <b>Not in Study<br/>(n=1204)</b> | <b>P Value</b> |
|--------------------------------------|-----------------------------|----------------------------------|----------------|
| Age at Fever Onset (years)           | 3.3 [1.8, 5.4]              | 2.8 [1.4, 4.9]                   | 0.001          |
| Gender                               |                             |                                  | 0.20           |
| Male                                 | 264 (57%)                   | 728 (60%)                        |                |
| Female                               | 200 (43%)                   | 476 (40%)                        |                |
| Race                                 |                             |                                  | <0.001         |
| White                                | 319 (69%)                   | 702 (58%)                        |                |
| Black                                | 42 (9%)                     | 97 (8%)                          |                |
| Asian                                | 53 (11%)                    | 164 (14%)                        |                |
| Other                                | 11 (2%)                     | 42 (3%)                          |                |
| >1 race reported, inc Asian          | 20 (4%)                     | 54 (4%)                          |                |
| >1 race reported, not Asian          | 9 (2%)                      | 96 (8%)                          |                |
| Unknown/not reported                 | 10 (2%)                     | 49 (4%)                          |                |
| Ethnicity                            |                             |                                  | <0.001         |
| Yes Hispanic                         | 71 (15%)                    | 356 (30%)                        |                |
| No                                   | 375 (81%)                   | 821 (68%)                        |                |
| Unknown/ not reported                | 18 (4%)                     | 27 (2%)                          |                |
| Number of Clinical Criteria Reported |                             |                                  | 0.02           |
| ≤3                                   | 102 (22%)                   | 338 (28%)                        |                |
| 4                                    | 239 (52%)                   | 601 (50%)                        |                |
| 5                                    | 123 (27%)                   | 265 (22%)                        |                |
